# Supplementary material for: Global Prospects of the Cost-Efficiency of Broiler Welfare in Middle-Segment Production Systems
Source: MDPI journal article supplement (doi:10.3390/ani9070473), 2019-07-23
Supplement: s1 [file s1]

## Sheet: Data
Farm no	Bird Type (Fast growing 1; Slow growing 2)	Genotype (Ross, Cobb, Hubbard, Ross males, Hubbard-sasso, Kemper landhoen)	# Housed	#Birds Site	Age visit	PFA	PFA2	Panting(% hijgende)	Huddling/%samensch	Active	Relaxed	Comfort	Cnf	Cal	Cnt	Ene	Fri	Pos	Hap	Inq	Pla	Fea	Agi	Dep	Ten	Uns	Fru	Bor	Sca	Nrv	Dis	Hlp	Dro	QBA index	QBA score	QBA +	QBA -	within arms length	Touched	Percentage Touched	Mean arm length	Theoretical touching area	Touch index	Index score	Drnkr type	# birds/drnkr	% compliance drinkers (p)	Mortality	Mortality/day
1	1	1	33000	26596	39	37	*	2.2	0	50	80	84	90	89	86	76	81	87	62	52	81	31	34	27	14	25	34	39	27	29	26	34	33	-1.60377	29.8599	76.5	29.4167	157	78	49.6815	7.47619	25.1668	29.7066	99.2852	1	8.31125	120.319	2.3	0.0589744
1	1	1	32400	26596	40	51	*	1.8	0	62	93	96	110	89	98	107	104	93	62	85	91	28	36	50	23	34	28	30	34	36	33	33	24	-0.91327	8.09012	90.8333	32.4167	95	27	28.4211	4.52381	25.1668	17.9753	99.77	1	8.31125	120.319	*	*
2	1	1	18000	14300	40	44	*	8.8	0	37	92	103	88	108	87	40	79	83	62	67	74	28	31	32	30	76	44	33	38	37	38	41	48	-2.57852	16.2226	70.5	41.8333	171	110	64.3275	8.14286	25.324	32.1547	98.8979	1	4.55414	219.58	2.3	0.0575
2	1	1	17730	14000	40	40	*	3.8	0	77	100	108	107	111	88	98	105	109	62	72	106	12	32	19	17	22	27	30	24	33	25	22	22	0.85482	59.5672	95.25	23.75	106	47	44.3396	5.04762	24.7927	20.3593	100	1	4.4586	224.286	3	0.075
4	1	1	34560	33370	34	44	*	6.8	0	41	79	80	62	89	76	47	77	49	62	50	47	20	44	48	36	42	45	79	43	42	43	46	41	-4.70212	0	59.3333	44.5833	122	66	54.0984	6.1	32.5979	18.7128	99.967	1	17.5632	56.9374	3.1	0.0911765
4	1	1	34380	33370	35	29	*	3.6	0	70	94	99	92	106	90	80	85	45	62	68	77	15	33	49	26	34	30	53	42	50	56	39	41	-3.16867	19.1361	80.6667	39	111	33	29.7297	5.28571	32.5979	16.2149	98.604	1	17.5632	56.9374	2.5	0.0714286
5	1	1	55000	53816	32	34	*	0	27.6	50	83	77	62	48	62	37	63	62	62	64	46	30	29	28	40	29	30	62	63	31	31	33	62	-3.5529	1.53543	59.6667	39	206	89	43.2039	9.4	26.6249	35.3053	98.3002	1	9.37561	106.66	1.2	0.0375
5	1	1	55000	54175	35	42	*	9.5	30.8333	74	89	85	41	75	62	50	106	38	62	12	26	34	3	23	44	43	10	62	52	62	43	28	16	-2.66287	17.7651	60	35	303	123	40.5941	14.4286	27.2313	52.9852	93.6253	1	9.43815	105.953	1.6	0.0457143
6	1	1	19600	19308	34	49	*	1.8	1	49	90	79	68	89	62	50	62	62	62	63	83	17	9	43	29	52	29	72	20	22	23	40	62	-3.36909	4.38679	68.25	34.8333	336	201	59.8214	15.3	29.1624	52.4648	93.7776	1	9.4	106.383	2.6	0.0764706
6	1	1	20900	20500	35	40	*	1	0	62	106	90	82	107	71	60	70	73	62	64	105	28	17	50	30	70	30	89	16	19	34	46	69	-3.69601	19.8845	79.3333	41.5	187	112	59.893	8.90476	30.9628	28.7595	99.416	1	9.99025	100.098	2.2	0.0628571
9	1	1	32500	24931	41	38	*	9.8	0	19	69	53	74	99	76	34	72	52	62	43	25	5	6	52	7	67	16	85	5	10	12	24	14	-3.04749	9	56.5	25.25	255	156	61.1765	12.1	22.8214	53.0204	93.6133	1	6.78	147.493	4.82769	0.117749
9	1	1	32940	25900	39	45	*	13	0	16	108	87	94	106	81	20	92	82	62	23	17	8	11	26	16	25	19	14	11	19	17	29	33	-1.57151	12.628	65.6667	19	249	162	65.0602	11.8571	23.7084	50.0124	94.5003	1	7.0457	141.931	1.5	0.0384615
10	1	2	36000	24000	42	30	59	0	0	89	102	88	80	91	82	75	77	101	62	46	58	19	6	7	5	33	13	5	4	17	7	30	6	0.9215	60	79.25	12.6667	128	104	81.25	6.4	22.1759	28.8601	99.4019	1	9.23	108.342	2	0.047619
10	1	2	39200	25600	42	58	*	13.8	0	70	101	79	80	96	77	72	90	78	62	48	32	17	9	7	5	36	18	15	8	14	4	41	13	-0.36021	3.43991	73.75	15.5833	149	134	89.9329	7.09524	23.6543	29.9955	99.2442	1	9.84615	101.562	2.8	0.0666667
11	1	2	36000	24000	35	38	*	1.6	0	77	77	96	95	101	87	80	81	84	62	56	78	26	24	23	23	31	22	21	18	38	29	27	27	-0.57245	43	81.1667	25.75	87	29	33.3333	4.1	29.6309	13.8369	95.3213	1	13.8391	72.259	3	0.0857143
11	1	2	32000	31533	34	50	*	4.4	0	87	79	96	99	88	100	96	99	87	62	76	94	22	23	19	15	28	23	27	27	21	29	20	38	0.29249	53.365	88.5833	24.3333	120	45	37.5	5.71429	28.1431	20.3044	100	1	13.1442	76.079	1.5	0.0441176
13	1	1	52000	35500	35	30	*	16	0	38	93	83	91	106	89	84	69	54	62	26	12	15	19	14	11	15	20	20	4	23	20	15	58	-1.09253	37	67.25	19.5	220	166	75.4545	10.5	23.729	44.2496	96.1322	2	8.28665	337.893	2	0.0571429
13	1	1	52000	38000	39	28	*	18.8	0	25	82	71	82	97	84	39	72	43	62	36	42	11	11	11	9	18	9	71	10	9	28	19	7	-1.89697	14.4716	61.25	17.75	270	201	74.4444	12.9	25.4001	50.7872	94.2734	2	8.87	315.671	3.27	0.0838462
14	1	4	20700	13000	42	41	28	6.5	0	40	49	51	82	74	70	69	42	46	62	17	17	85	13	21	77	23	22	52	51	76	58	39	49	-5.54643	0	51.5833	47.1667	103	45	43.6893	4.9	21.4951	22.7959	99.9438	1	7.7381	129.231	3.4	0.0809524
14	1	1	*	*	*	*	*	*	*	*	*	*	*	*	*	*	*	*	*	*	*	*	*	*	*	*	*	*	*	*	*	*	*	*	*	*	*	*	*	*	*	*	*	*	*	*	*	*	*
15	1	1	43470	42220	32	48	*	3.4	0	94	89	81	77	90	77	100	84	103	62	69	46	21	11	12	9	48	22	14	5	34	9	42	11	0.06065	50.7056	81	19.8333	113	76	67.2566	5.4	32.8637	16.4315	98.8028	1	13.3608	74.846	2.45	0.0765625
15	1	1	43000	41700	34	45	*	0.4	0	87	41	53	35	74	46	86	57	82	62	42	33	72	16	11	51	78	24	12	38	90	28	52	13	-2.81122	13	58.1667	40.4167	119	67	56.3025	5.7	32.459	17.5606	99.5857	1	13.1962	75.7794	2.6	0.0764706
17	1	1	26640	25960	35	29	*	0.6	0	82	92	83	96	93	91	96	91	95	62	90	85	22	31	20	35	17	15	21	22	21	22	28	23	0.27222	53	88	23.0833	106	41	38.6792	5	32.9119	15.1921	97.4447	1	5.1	196.078	2.6	0.0742857
17	1	1	26460	25735	34	31	*	17.4	0	32	85	40	35	83	47	39	62	39	62	42	44	47	41	86	39	79	74	101	42	34	43	91	90	-9.60255	0	50.8333	63.9167	67	38	56.7164	3.19048	32.6267	9.77874	84.5149	1	5.04608	198.174	3.2	0.0941176
18	1	1	40000	32500	36	36	*	1.25	0	71	85	87	77	83	73	79	80	91	62	53	50	14	12	14	14	26	18	9	8	41	13	34	11	-0.1452	48	74.25	17.8333	139	109	78.4173	6.6	30.5328	21.6161	99.9833	1	11.28	88.6525	2.5	0.0694444
18	1	1	40000	32300	34	37	*	1.6	0	70	87	60	72	103	77	73	73	77	62	67	29	25	12	12	10	48	10	19	3	20	5	40	7	-0.62506	5.76222	70.8333	17.5833	128	81	63.2812	6.09524	30.3449	20.0865	99.9999	1	11.2153	89.1641	1.6	0.0470588
19	1	1	25000	24500	36	44	*	0.8	0	75	28	75	19	50	45	76	45	75	62	39	15	84	4	13	77	87	50	28	68	95	43	51	7	-4.00917	0	50.3333	50.5833	109	64	58.7156	5.2	32.0704	16.2143	98.6035	1	15.31	65.3168	1.6	0.0444444
19	1	1	21770	20570	37	53	*	28	0	85	106	94	82	103	75	77	83	104	62	81	67	4	7	10	5	30	11	20	3	16	6	26	21	1.16385	62.8261	84.9167	13.25	153	137	89.5425	7.28571	26.9261	27.0582	99.6193	1	12.8562	77.7832	5.5	0.148649
20	1	4	21500	21000	32	40	38	1.67	0	31	92	91	100	85	78	23	68	55	62	24	46	29	41	19	29	71	43	37	34	60	42	49	49	-4.3941	19.8059	62.9167	41.9167	196	133	67.8571	9.33333	37.0221	25.2101	99.7941	1	12.931	77.3333	2	0.0625
20	1	4	21200	14600	49	31	25	2	0	29	49	36	48	44	39	27	30	24	62	28	16	50	69	66	71	82	75	95	77	80	86	92	95	-12.2116	0	36	78.1667	219	106	48.4018	10	25.7392	38.8513	97.5129	1	8.99	111.235	2	0.0408163
21	1	1	36900	23300	43	26	*	6	0	38	103	84	89	102	112	44	66	44	62	75	47	12	17	9	15	19	16	8	6	5	15	13	13	0.46527	55	72.1667	12.3333	121	56	46.281	5.19048	20.288	25.584	99.762	1	10.15	98.5222	2	0.0465116
21	1	1	38700	24700	42	27	31	8	0	66	106	96	96	113	100	81	66	51	62	67	81	8	13	10	16	13	13	15	14	15	26	12	22	0.70974	58.0007	82.0833	14.75	75	48	64	3.57143	21.507	16.6059	98.9513	1	10.7625	92.915	2	0.047619
22	1	1	30510	19500	42	36	*	2.4	0	74	71	78	88	92	89	71	86	87	62	55	89	24	23	27	24	36	22	20	44	34	32	20	35	-0.65062	42	78.5	28.4167	80	22	27.5	3.8	24.0239	15.8176	98.1974	1	8.02469	124.615	4	0.0952381
22	1	1	30600	19010	42	35	*	2.2	0	108	103	103	100	106	99	89	114	97	62	86	109	14	35	21	25	33	26	23	30	27	26	22	36	1.00585	61.1732	98	26.5	169	92	54.4379	26.6523	23.4203	113.8	94.4959	1	7.82305	127.827	2.2	0.052381
23	1	1	36000	31000	38	28	30	9.2	0	77	32	27	20	33	42	49	77	49	62	46	58	77	15	42	86	85	34	21	77	101	80	36	27	-5.54435	0	47.6667	56.75	88	52	59.0909	4.2	30.0584	13.9728	95.5656	1	14.3519	69.6774	2	0.0526316
23	1	1	26900	26050	34	29	*	3	0	66	47	53	51	64	49	68	77	85	62	51	37	65	20	14	40	75	28	25	21	86	31	73	26	-4.31321	19.8774	59.1667	42	95	34	35.7895	4.5	30.7663	14.6264	96.642	1	14.4722	69.0979	2.9	0.0852941
24	1	1	35500	35014	35	42	*	1.6	0	73	87	83	86	84	79	83	84	84	62	54	75	34	34	31	38	20	19	26	33	34	47	31	32	-1.8274	27	77.8333	31.5833	91	18	19.7802	4.3	34.3749	12.5091	92.5501	1	13.7526	72.7138	1.5	0.0428571
24	1	1	36500	31730	37	28	*	3.8	0	96	98	103	98	102	109	98	96	93	62	32	97	19	18	15	25	27	25	22	23	27	26	39	24	0.04399	50.5122	90.3333	24.1667	162	86	53.0864	7.7	29.4622	26.1351	99.7128	1	14.6898	68.0744	4	0.108108
25	1	1	57000	43000	38	53	*	10	0	63	97	102	93	94	94	84	95	94	62	79	95	20	18	20	17	25	17	20	21	27	22	28	22	0.50319	56	87.6667	21.4167	175	95	54.2857	8.3	27.8533	29.799	99.2719	1	9.73	102.775	2.5	0.0657895
25	1	1	36200	30010	38	58	*	3.4	0	83	96	96	102	82	105	111	104	87	62	82	81	27	38	23	27	27	29	27	25	22	33	25	30	-0.00235	49.9726	90.9167	27.75	113	52	46.0177	5.4	30.4443	17.7373	99.6709	1	11.7871	84.8384	1.9	0.05
26	1	3	27000	26000	34	40	*	0.8	0	49	77	67	51	77	50	92	80	95	62	53	44	42	23	11	17	68	20	13	10	50	10	46	11	-1.19223	35	66.4167	26.75	108	63	58.3333	5.4	34.0339	15.8665	98.2505	1	14.4444	69.2308	3.1	0.0911765
26	1	3	57800	47000	35	31	*	1.4	0	67	40	50	47	61	47	62	85	92	62	39	42	82	27	15	57	82	28	11	23	72	11	70	27	-3.53304	19.7274	57.8333	42.0833	111	63	56.7568	5.3	34.0994	15.5428	97.884	1	10.6335	94.0426	2	0.0571429
27	1	1	35300	27800	33	35	*	4	0	34	93	83	62	82	62	43	62	39	62	40	49	33	36	79	35	35	48	93	36	34	40	87	77	-7.97728	0	59.25	52.75	98	73	74.4898	4.7	29.1121	16.1445	98.536	1	12.6364	79.1367	1.3	0.0393939
27	1	1	35360	28076	35	35	*	21.6667	15.3333	44	39	47	35	67	24	23	83	33	62	37	22	78	44	46	75	39	34	21	81	39	46	39	18	-5.28131	17.9478	43	46.6667	495	259	52.3232	23.6	29.4011	80.2691	87.1681	1	12.7618	78.3587	1.3	0.0371429
28	1	1	18400	12640	36	45	*	1.8	0	94	81	72	75	110	89	74	71	66	62	29	82	9	14	24	6	15	11	56	10	18	29	17	15	-0.60858	43	75.4167	18.6667	123	37	30.0813	5.9	20.2601	29.1213	99.3668	1	10.53	94.9668	0.869565	0.0241546
28	1	1	18200	12000	37	57	*	4.33333	0	77	99	84	104	110	94	59	74	50	62	34	79	12	9	13	18	14	8	66	11	9	19	12	13	-0.30422	2.92651	77.1667	17	61	24	39.3443	2.9	19.2342	15.0773	97.2913	1	10	100	1.98	0.0535135
29	1	1	27270	26700	34	43	*	1.2	0	86	90	90	98	100	99	90	91	90	62	94	87	10	20	16	20	16	16	23	20	26	24	19	32	0.79259	59	89.75	20.1667	118	56	47.4576	5.6	33.2859	16.8239	99.1226	1	12.7874	78.2022	2	0.0588235
29	1	1	28080	27716	34	36	*	1.2	0	38	72	73	79	109	77	68	86	84	62	87	77	21	20	27	11	23	32	12	15	22	20	29	16	-0.60456	5.58873	76	20.6667	147	71	48.2993	7	34.5525	20.259	100	1	13.2739	75.3355	1	0.0294118
31	1	1	32040	30714	32	36	*	0	0	41	80	88	75	92	81	53	50	69	62	38	29	41	29	33	30	36	35	36	45	41	42	46	51	-3.93207	0	63.1667	38.75	137	32	23.3577	6	33.2727	18.0328	99.7914	1	15.2	65.7895	4.1	0.128125
31	1	1	27900	26620	34	51	*	0.4	0	78	85	87	99	95	96	90	96	85	62	37	97	21	28	29	31	37	32	28	30	31	35	29	36	-1.06838	9.25701	83.9167	30.5833	884	68	7.69231	4	28.8376	13.8708	95.3828	1	13.1457	76.0706	4.5	0.132353
32	1	2	25200	17200	38	*	*	1.7	0	70	90	75	84	97	80	89	77	76	62	71	72	28	39	32	29	28	31	34	35	44	38	45	41	-2.50522	17	78.5833	35.3333	93	19	20.4301	4.4	23.092	19.0542	100.003	1	10.92	91.5751	2.4	0.0631579
32	1	2	24800	17010	38	55	48	1.2	0	83	90	96	106	98	106	104	104	81	62	40	106	25	22	23	22	16	28	32	24	35	31	39	27	-0.69821	6.37273	89.6667	27	113	51	45.1327	5.4	22.837	23.6459	99.902	1	10.8	92.5926	4.5	0.118421
33	1	1	46000	32579	39	37	*	1.8	0	90	82	87	101	83	87	87	74	93	62	86	74	20	19	20	18	27	24	28	30	28	26	28	30	-0.46834	44	83.8333	24.8333	128	47	36.7188	6.1	25.8459	23.6014	99.9038	1	10.77	92.8505	2.2	0.0564103
33	1	1	46000	35750	40	37	*	2.75	0	72	96	69	80	87	62	68	83	94	62	52	48	23	9	12	13	44	19	10	6	24	4	45	10	-0.7304	6.63714	72.75	18.25	105	39	37.1429	5	28.3616	17.6295	99.6201	1	11.8221	84.5874	1.6	0.04
34	1	1	20000	15000	40	50	*	2.2	0	90	72	81	65	92	74	68	71	94	62	51	35	22	8	9	16	61	13	11	4	52	11	47	13	-0.73776	41	71.25	22.25	131	80	61.0687	6.2	27.3976	22.6297	99.9508	1	9.6	104.167	3	0.075
34	1	1	47000	46000	34	31	*	0	0	72	96	69	23	9	80	12	87	62	13	44	68	19	10	83	94	6	24	62	4	45	52	10	48	-3.43088	19.5951	52.9167	38.0833	125	103	82.4	6	27.9456	21.4703	99.9872	1	14.7294	67.8913	2.1	0.0617647
35	1	1	47000	46000	35	46	*	1.3	0	41	81	69	49	68	85	85	82	93	62	80	72	26	10	12	74	47	22	19	18	48	22	32	27	-0.55958	43	72.25	29.75	131	107	81.6794	6.2	34.3313	18.0593	99.8009	1	14.4	69.4444	2	0.0571429
35	1	1	20200	15300	36	34	*	78	0	66	77	81	53	76	82	98	82	93	62	35	23	29	14	5	31	53	14	24	10	54	12	48	20	-0.95512	8.41088	69	26.1667	149	103	69.1275	7.1	36.6413	19.377	100.006	1	9.78887	102.157	2	0.0555556
37	1	1	26700	16700	42	51	*	64	0	85	84	72	77	89	65	99	81	95	62	32	32	20	17	12	9	42	28	26	14	30	7	51	12	-1.30886	34	72.75	22.3333	145	117	80.6897	6.9	22.8107	30.249	99.2057	1	10.36	96.5251	3.9	0.0928571
37	1	1	27000	19680	40	38	*	1.2	0	77	71	49	56	71	71	75	56	88	62	54	46	71	19	7	29	57	20	30	32	93	9	49	6	-1.74505	13.644	64.6667	35.1667	71	43	60.5634	3.4	26.8811	12.6483	92.8739	1	12.2084	81.9106	2.49	0.06225
38	1	1	30240	28970	34	45	*	5.2	0	23	92	75	59	106	86	54	77	35	62	68	52	25	10	26	16	18	23	110	8	14	11	13	43	-1.78721	27	65.75	26.4167	199	67	33.6683	9.5	32.5043	29.2269	99.3524	1	14.6	68.4932	4.2	0.123529
38	1	1	30960	30470	33	32	*	14.3333	42	94	30	62	42	34	62	112	88	93	62	62	92	51	63	24	66	54	30	34	80	62	37	30	62	-2.11438	15.5555	69.4167	49.4167	327	66	20.1835	14.9	34.1873	43.5835	96.3135	1	15.3889	64.9819	1.31	0.039697
42	1	1	15660	15210	32	40	41	0.2	0	76	97	69	49	86	33	79	82	89	62	73	49	20	29	13	11	50	11	9	7	27	15	39	14	-0.70951	41	70.3333	20.4167	126	91	72.2222	6	30.0526	19.965	99.9366	1	14.7	68.0272	3.19285	0.0997765
42	1	1	15480	14935	31	43	*	0.4	0	94	69	80	46	70	87	105	84	107	62	51	75	88	16	8	30	74	16	10	55	31	8	50	8	0.06014	50.6996	77.5	32.8333	80	42	52.5	3.8	29.5092	12.8773	93.3896	1	14.4439	69.2333	3.51	0.113226
43	1	1	29000	28300	34	39	*	0.8	0	80	95	105	101	100	97	87	97	57	62	22	89	6	13	16	12	22	18	14	26	19	23	29	36	-0.13978	48	82.6667	19.5	144	58	40.2778	6.5	27.7835	23.3952	99.915	1	12.4123	80.5654	2.4	0.0705882
43	1	1	29000	28400	34	38	*	1	0	75	112	101	108	96	107	97	89	91	62	25	102	9	26	24	14	32	21	28	19	15	25	27	36	0.02532	50.2951	88.75	23	109	49	44.9541	5.2	27.8816	18.6503	99.9567	1	12.4561	80.2817	2.1	0.0617647
44	1	1	31500	22500	42	*	*	7	0	56	66	80	81	96	66	52	65	29	62	13	70	14	25	29	13	29	16	73	13	16	14	26	33	-2.55826	16	61.3333	25.0833	142	92	64.7887	6.8	23.9451	28.3983	99.4616	1	7.1	140.845	3.9	0.0928571
44	1	1	32000	22100	40	28	42	0.8	0	48	115	107	100	111	81	46	70	77	62	49	16	8	12	8	5	26	30	46	3	4	3	15	78	-0.64861	5.96023	73.5	19.8333	183	183	100	8.7	23.5194	36.9908	97.9409	1	7.01587	142.534	2.5	0.0625
45	1	1	40000	27500	40	46	*	19.5	16.6	88	47	62	42	86	49	90	77	103	62	62	83	10	38	8	29	32	9	62	2	24	11	26	37	-0.53644	44	70.9167	24	287	71	24.7387	13	24.5437	52.9668	93.6292	1	10.05	99.5025	3	0.075
45	1	1	41500	23000	43	48	*	28.4	0	21	68	58	76	104	65	40	66	51	62	22	28	11	10	14	11	16	20	63	11	14	51	15	47	-3.51387	19.7046	55.0833	23.5833	181	141	77.9006	8.6	20.5274	41.8951	96.7585	1	8.40951	118.913	4.12	0.095814
46	1	1	17000	11500	36	51	*	0	0	30	95	87	71	86	75	43	46	87	62	45	52	47	23	15	19	34	22	30	17	76	45	38	74	-3.17349	7	64.9167	36.6667	64	31	48.4375	3	18.4328	16.2753	98.6611	1	23.6626	42.2609	6	0.166667
46	1	1	17010	16400	39	41	*	36	0	68	40	49	44	55	68	68	77	83	62	44	57	77	21	6	72	81	13	17	27	88	7	51	7	-1.83989	14.1674	59.5833	38.9167	69	36	52.1739	3.3	26.2868	12.5538	92.655	2	31.0606	90.1463	3.5	0.0897436
47	1	1	29000	28404	34	50	*	4.1	0	32	101	102	94	105	91	77	86	52	62	75	47	18	33	30	26	23	25	30	26	32	23	35	38	-1.52369	31	77	28.25	129	66	51.1628	5.9	31.3101	18.8438	99.9849	1	12.9699	77.1018	2.1	0.0617647
47	1	1	26460	25900	34	43	*	1.4	0	95	95	87	97	91	99	88	87	103	62	89	89	31	30	29	29	20	22	20	18	24	22	24	18	0.53175	56.0468	90.1667	23.9167	62	16	25.8065	3	28.5499	10.5079	86.9837	1	11.8265	84.556	2.2	0.0647059
48	1	1	19500	14333	42	38	*	2.6	0	63	74	92	67	74	84	74	46	93	62	42	23	54	20	9	30	55	10	15	19	70	34	15	31	-0.6829	42	66.1667	30.1667	116	84	72.4138	5.5	23.2105	23.6961	99.8984	1	7.54	132.626	2.3	0.0547619
48	1	1	19800	15030	41	32	*	3	0	78	105	89	87	94	84	77	89	103	62	68	53	19	10	10	8	19	15	12	8	18	8	25	11	1.04465	61.5817	82.4167	13.5833	98	62	63.2653	4.7	24.3392	19.3104	100.008	1	7.91053	126.414	1.8	0.0439024
3	2	3	25650	24912	53	52		0.4	0	93	82	82	82	79	92	99	83	83	62	101	90	51	29	26	41	39	39	40	42	41	37	37	39	-1.48125	31.4993	85.6667	38.4167	109	65	59.633	5.19048	16.3049	31.8339	98.9527	1	14.2354	70.2473	2.8	0.0528302
3	2	3	26010	25793	55	49	51	4.4	0	92	88	84	74	71	86	100	74	80	62	88	106	80	49	41	71	47	44	42	77	45	36	46	38	-2.40511	16.8204	83.75	51.3333	15	0	0	1.3	16.8815	7.70075	76.1002	1	14.7389	67.8479	1	0.0181818
8	2	3	21500	20973	52	31	*	8.4	0	62	90	72	70	92	77	62	85	69	62	69	50	28	28	28	31	45	35	62	35	41	62	44	47	-4.05284	0	71.6667	40.5	5	0	0	0.4	17.1585	2.33121	43.8765	1	18.4135	54.3079	2.7	0.0519231
8	2	3	21450	21150	53	49	*	0.6	0	84	75	93	76	85	88	96	86	100	62	87	92	48	22	10	17	51	14	28	15	53	9	33	8	0.84785	59.4925	85.3333	25.6667	5	0	0	1	17.3033	5.77924	66.3883	1	18.5689	53.8534	1.4	0.0264151
12	2	3	13500	13300	55	31	*	0	0	92	90	91	90	84	87	87	88	93	62	91	90	58	34	32	38	41	39	39	33	30	33	30	31	-1.04506	37	87.0833	36.5	13	2	15.3846	0.6	16.3856	3.66176	53.373	1	10.5	95.2381	1.3	0.0236364
12	2	3	16920	16580	51	61	69	3.6	0	92	76	105	75	100	85	94	46	101	62	87	78	46	24	5	53	50	13	7	32	71	2	27	4	1.51409	66.3913	83.4167	27.8333	35	20	57.1429	1.7	20.4265	8.32252	78.8383	1	13.0551	76.5983	2	0.0392157
16	2	3	11000	10823	50	59	*	0	0	74	86	86	98	87	87	86	102	100	62	106	88	20	20	29	27	30	29	36	26	24	27	30	25	-0.4306	45	88.5	26.9167	230	165	71.7391	10.5	16.2998	64.4178	90.3441	1	11	90.9091	1.5	0.03
16	2	3	10710	10645	53	45	57	1.6	0	82	91	94	90	76	81	84	88	87	62	79	87	46	36	36	42	33	43	43	42	41	37	41	42	-2.22106	16.0442	83.4167	40.1667	117	23	19.6581	5.6	15.8795	35.2656	98.3094	1	10.7852	92.7196	0.6	0.0113208
30	2	3	12150	11970	54	52	*	0	0	108	42	92	63	70	102	111	44	107	62	101	112	83	10	6	84	79	10	9	83	113	7	12	3	2.25621	74	84.5	41.5833	0	0	0	0	17.0931	0	24.631	1	15.6	64.1026	1.35802	0.0251486
30	2	3	16380	16180	53	59	*	0	0	42	79	62	62	80	47	42	62	46	62	56	49	40	40	81	46	39	80	97	34	35	44	77	77	-8.49138	0	57.4167	57.5	2	0	0	0.2	16.292	1.2276	35.1897	1	21.15	47.2813	1.16	0.0218868
36	2	3	23670	23470	50	48	*	0	0	112	45	86	79	90	97	103	74	106	62	77	43	75	4	4	25	47	8	6	31	39	4	14	1	1.94873	71	81.1667	21.5	1	0	0	0.1	16.3851	0.610309	30.0003	1	13.4	74.6269	0.422476	0.00844951
36	2	3	23670	23300	55	27	*	0	0	111	71	106	83	27	99	116	85	107	62	93	87	94	5	5	98	18	9	16	90	80	5	5	1	2.60782	76.6472	87.25	35.5	0	0	0	0	16.2665	0	24.631	1	13.3143	75.1073	1.55	0.0281818
39	2	3	21240	20550	54	29	*	0	0	95	90	100	105	89	103	98	78	81	62	101	85	13	8	17	28	16	13	10	16	22	14	5	10	2.16937	73	90.5833	14.3333	0	0	0	0	15.3714	0	24.631	1	22.3	44.843	3.24859	0.060159
39	2	3	21330	21050	52	46	*	0	0	101	82	100	103	104	95	87	81	80	62	86	98	9	12	13	41	11	12	16	12	17	16	14	17	1.51287	66.3791	89.9167	15.8333	0	0	0	0	15.7454	0	24.631	1	20.0476	49.8812	1.3	0.025
41	2	3	18720	18586	50	29	*	0	0	108	75	94	99	84	103	105	97	106	62	103	77	5	7	9	13	13	9	19	12	21	29	10	6	1.98924	71	92.75	12.75	0	0	0	0	20.8534	0	24.631	1	9.4	106.383	0.715812	0.0143162
41	2	3	18180	17088	50	49	*	0.2	0	60	84	82	86	90	90	82	78	86	62	74	82	12	23	22	31	39	33	42	34	37	23	25	25	-0.66223	6.07411	79.6667	28.8333	46	11	23.913	2.2	14.9787	14.6876	96.7345	1	8.6303	115.871	1.1	0.022
49	2	3	20250	19900	55	73	*	1.2	0	116	94	113	103	91	115	117	82	96	62	105	107	66	26	16	47	39	32	49	46	49	33	26	16	0.60493	57	100.083	37.0833	83	21	25.3012	4	16.0302	24.9529	99.8136	1	16.8359	59.397	1.5	0.0272727
49	2	3	19980	19500	53	33	*	0.6	0	114	97	113	108	89	109	102	107	101	62	96	100	74	23	31	40	26	28	36	44	78	38	23	27	0.30777	53.5381	99.8333	39	83	21	25.3012	4	15.708	25.4648	99.7729	1	16.5	60.6061	2	0.0377358
50	2	3	22320	22076	52	49	*	0.4	0	85	76	90	91	62	62	98	94	89	62	99	81	62	41	33	62	40	32	30	54	54	25	39	26	-1.55353	30	82.4167	41.5	12	0	0	1	16.6716	5.99823	67.5933	1	18.8684	52.9987	1	0.0192308
50	2	3	21600	21425	51	28	54	0	0	86	58	84	86	62	73	96	80	80	62	100	80	45	52	45	49	48	46	48	62	62	37	38	40	-2.74891	18.0435	78.9167	47.6667	26	0	0	2.2	16.18	13.5971	94.8726	1	18.312	54.6091	0.8	0.0156863
[truncated: 94 more columns]
